# Supplementary material
Source: PubMed Central journal article supplement (PMC1754632)
Supplement: annrheumd_62_8_732__2.pdf [file annrheumd_62_8_732__2.pdf]

**Appendix 2:** Sources of the unit costs for resources used, separate for the societal and the financial perspective.

| <b>Societal perspective<br/>All countries</b> |                                                        | <b>Financial perspective</b>                                                |                                                                      |                      |
|-----------------------------------------------|--------------------------------------------------------|-----------------------------------------------------------------------------|----------------------------------------------------------------------|----------------------|
|                                               |                                                        | <b>Netherlands*</b>                                                         | <b>France</b>                                                        | <b>Belgium</b>       |
| <b>Direct healthcare costs</b>                |                                                        |                                                                             |                                                                      |                      |
| Physicians visits                             | DGPES                                                  | National tariff<br>(private or public insured)                              | Country specific national tariff<br>(exclusive patient contribution) |                      |
| Other care providers                          | DGPES                                                  | National tariff<br>(private or public insured)                              | Country-specific national tariff<br>(exclusive patient contribution) |                      |
| Alternative medicine                          | Dutch study on mean costs                              | National tariff specialist<br>(private or public insured)                   | National tariff (specialist)                                         | National tariff (GP) |
| Drugs                                         | Dutch market price + delivery fee                      | Market price & delivery fee                                                 | Country price (exclusive patient contribution)                       |                      |
| Technical procedures                          | True cost estimation by University Hospital Maastricht | National tariff                                                             | Country-specific national tariff<br>(exclusive patient contribution) |                      |
| In-patient care                               | DGPES                                                  | National tariff (exclusive pt contribution of € 3.6/day)                    | Country-specific national tariff<br>(exclusive patient contribution) |                      |
| Family help                                   | DGPES                                                  | Country-specific reimbursement by home-help organisation                    |                                                                      |                      |
| Aids and appliances                           | Dutch market price                                     | Mean tariff different insurers                                              | National tariff                                                      |                      |
| Adaptations at house                          | Dutch market price                                     | Country-specific reimbursement by country-specific authorised organisation. |                                                                      |                      |
| Spa treatment                                 | Market price                                           | Mean tariff insurers                                                        | Mean tariff insurers                                                 | No external payer    |
| <b>Direct non-healthcare costs</b>            |                                                        |                                                                             |                                                                      |                      |
| Private household help                        | DGPES                                                  | Personal budget (if applicable)                                             | No external payer                                                    | No external payer    |
| Informal help                                 | DGPES                                                  | No external payer                                                           | No external payer                                                    | No external payer    |
| Transport                                     | DGPES                                                  | Reimbursement by insurer                                                    | Reimbursement by insurer                                             | No external payer    |
| Contributions care organisations              | Market price                                           | No external payer                                                           | No external payer                                                    | No external payer    |
| Swim- & exercise-group                        | Market price                                           | No external payer                                                           | No external payer                                                    | No external payer    |
| Adaptations work-place                        | Market price                                           | Employer                                                                    | employer                                                             | No external payer    |

DGPES: Dutch guideline pharmacoeconomic studies
