# Supplementary material
Source: PubMed Central journal article supplement (PMC1754632)
Supplement: annrheumd_62_8_732__3.pdf [file annrheumd_62_8_732__3.pdf]

### Appendix 3: Differences in costs among several subgroups of patients.

Table 1: Societal costs stratified by gender.

|                                    | Female patients (=62)  | Male patients (n=147)  |
|------------------------------------|------------------------|------------------------|
|                                    | €/pt/yr: Mean [median] | €/pt/yr: Mean [median] |
| General practitioner               | 28 [9]                 | 33 [9]                 |
| Specialist                         | 172 [95]               | 193 [115]              |
| Physiotherapy                      | 434 [421]              | 317 [77]               |
| Other care providers               | 33 [0]                 | 16 [0]                 |
| Medication                         | 352 [226]              | 325 [192]              |
| In-patient care                    | 395 [0]                | 835 [0]                |
| Technical examinations             | 166 [60]               | 216 [52]               |
| Aids and adaptations               | 287 [0]                | 70 [0]                 |
| Formal home care                   | 464 [0]                | 166 [[0]               |
| <b>Direct healthcare costs</b>     | <b>2,329 [1,172]</b>   | <b>2,121 [978]</b>     |
| Contributions                      | 45 [0]                 | 40 [12]                |
| Informal care                      | 994 [0]                | 82 [0]                 |
| Transport costs                    | 71 [23]                | 76 [38]                |
| <b>Direct non-healthcare costs</b> | <b>1,110 [134]</b>     | <b>197 [81]</b>        |
| <b>Total direct costs</b>          | <b>3,439 [1,522]</b>   | <b>2,318 [1,125]</b>   |

## Appendix III

Table 2: Societal costs stratified by educational level.

|                                    | <b>≤ 12 years education</b>   | <b>12 years education</b>     |
|------------------------------------|-------------------------------|-------------------------------|
|                                    | <b>(n=149)</b>                | <b>(n=59)</b>                 |
|                                    | <b>€/pt/yr: Mean [median]</b> | <b>€/pt/yr: Mean [median]</b> |
| General practitioner               | 35 [9]                        | 26 [9]                        |
| Specialist                         | 202 [115]                     | 150 [84]                      |
| Physiotherapy                      | 384 [134]                     | 252 [43]                      |
| Other care providers               | 26 [0]                        | 12 [0]                        |
| Medication                         | 353 [180]                     | 290 [180]                     |
| In-patient care                    | 730 [0]                       | 676 [0]                       |
| Technical examinations             | 216 [63]                      | 168 [48]                      |
| Aids and adaptations               | 153 [0]                       | 38 [0]                        |
| Formal home care                   | 261 [0]                       | 62 [0]                        |
| <b>Direct healthcare costs</b>     | <b>2,359 [1,152]</b>          | <b>1,672 [792]</b>            |
| Contributions                      | 47 [21]                       | 25 [15]                       |
| Informal care                      | 347 [0]                       | 385 [0]                       |
| Transport costs                    | 77 [39]                       | 62 [25]                       |
| <b>Direct non-healthcare costs</b> | <b>471 [122]</b>              | <b>472 [50]</b>               |
| <b>Total direct costs</b>          | <b>2,830 [1,435]</b>          | <b>2,146 [924]</b>            |

## Appendix III

Table 3: Societal costs stratified by disease activity (BASDAI).

|                                    | <b>BASDAI&lt;4 (n=131)</b>    | <b>BASDAI≥4 (n=78)</b>        |
|------------------------------------|-------------------------------|-------------------------------|
|                                    | <b>€/pt/yr: Mean [median]</b> | <b>€/pt/yr: Mean [median]</b> |
| General practitioner               | 23 [9]                        | 47 [10]                       |
| Specialist                         | 161 [76]                      | 232 [126]                     |
| Physiotherapy                      | 290 [77]                      | 455 [153]                     |
| Other care providers               | 13 [0]                        | 36 [0]                        |
| Medication                         | 289 [168]                     | 415 [296]                     |
| In-patient care                    | 177 [0]                       | 1,631 [0]                     |
| Technical examinations             | 137 [40]                      | 316 [95]                      |
| Aids and adaptations               | 42 [0]                        | 278 [0]                       |
| Formal home care                   | 103 [0]                       | 425 [0]                       |
| <b>Direct healthcare costs</b>     | <b>1,235 [928]</b>            | <b>3,835 [1,745]</b>          |
| Contributions                      | 35 [9]                        | 52 [55]                       |
| Informal care                      | 63 [0]                        | 522 [0]                       |
| Transport costs                    | 56 [27]                       | 107 [58]                      |
| <b>Direct non-healthcare costs</b> | <b>233 [74]</b>               | <b>888 [147]</b>              |
| <b>Total direct costs</b>          | <b>1,468 [1,053]</b>          | <b>4,723 [2,513]</b>          |

## Appendix III

Table 4: Societal costs stratified by presence of extra-spinal manifestations.

|                                    | <b>No extra-spinal manifestations</b><br><b>(n=143)</b><br><b>€/pt/yr: Mean [median]</b> | <b>Extraspinal manifestations</b><br><b>(n=66)</b><br><b>€/pt/yr: Mean [median]</b> |
|------------------------------------|------------------------------------------------------------------------------------------|-------------------------------------------------------------------------------------|
| General practitioner               | 27 [9]                                                                                   | 43 [18]                                                                             |
| Specialist                         | 149 [76]                                                                                 | 268 [160]                                                                           |
| Physiotherapy                      | 314 [85]                                                                                 | 432 [317]                                                                           |
| Other care providers               | 24 [0]                                                                                   | 15 [0]                                                                              |
| Medication                         | 258 [154]                                                                                | 495 [348]                                                                           |
| In-patient care                    | 363 [0]                                                                                  | 1,444 [0]                                                                           |
| Technical examinations             | 142 [44]                                                                                 | 330 [105]                                                                           |
| Aids and adaptations               | 127 [0]                                                                                  | 149 [0]                                                                             |
| Formal home care                   | 100 [0]                                                                                  | 476 [0]                                                                             |
| <b>Direct healthcare costs</b>     | <b>1,504 [872]</b>                                                                       | <b>3,653 [1,690]</b>                                                                |
| Contributions                      | 35 [9]                                                                                   | 55 [55c]                                                                            |
| Informal care                      | 93 [0]                                                                                   | 526 [0]                                                                             |
| Transport costs                    | 62 [30]                                                                                  | 101 [54]                                                                            |
| <b>Direct non-healthcare costs</b> | <b>294 [79]</b>                                                                          | <b>846 [150]</b>                                                                    |
| <b>Total direct costs</b>          | <b>1,798 [1,063]</b>                                                                     | <b>4,499 [1,971]</b>                                                                |
